# Supplementary material for: Knockout of mafba Causes Inner-Ear Developmental Defects in Zebrafish via the Impairment of Proliferation and Differentiation of Ionocyte Progenitor Cells
Source: MDPI journal article supplement (doi:10.3390/biomedicines9111699), 2021-11-16
Supplement: s1 [file s1]

Supplementary Files

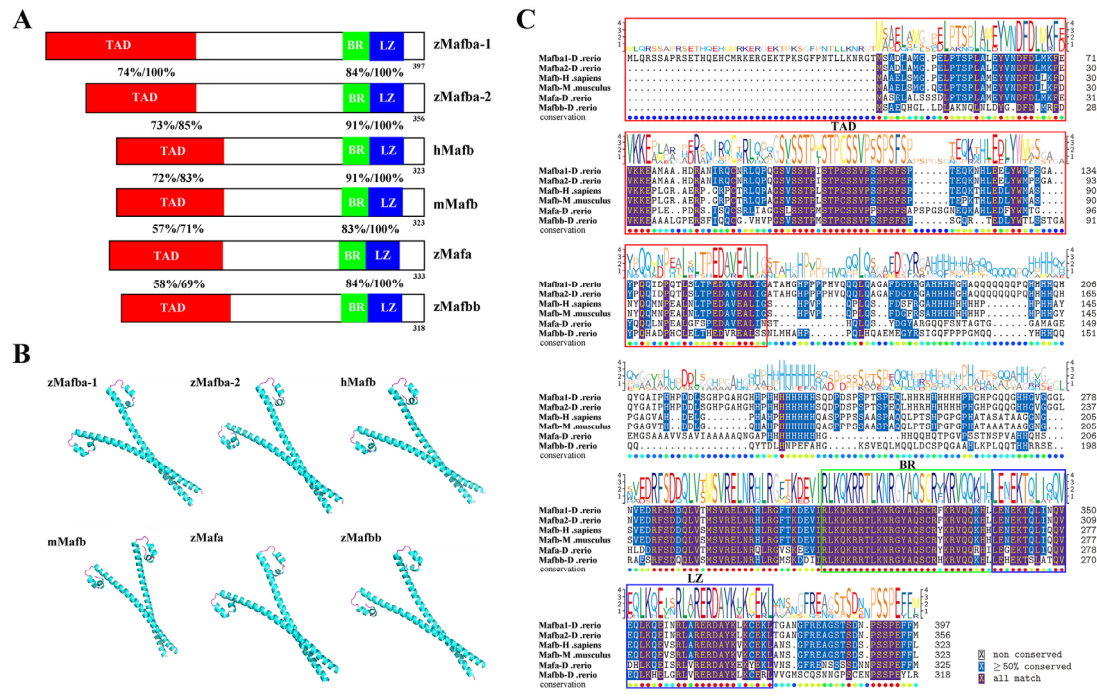

**Figure S1.** The domain features and homologous comparison of the transcription factor Maiba among mammals and zebrafish. **(A)** Schematic representation of the three functional domains of zebrafish, mouse and human Maiba proteins, and the Maifa of zebrafish, respectively. The percentage of identity/similarity was indicated for the transactivation domain (TAD), the basic region (BR) and the leucine zipper domain (LZ). **(B)** 3D protein model of the **(A)** were shown in **(B)**. **(C)** The amino acid sequence alignment of Maiba and Maifa domains in various species. The red box represented the transactivation domain (TAD), green box and blue box represented the basic region (BR) and the leucine zipper domain (LZ), respectively.

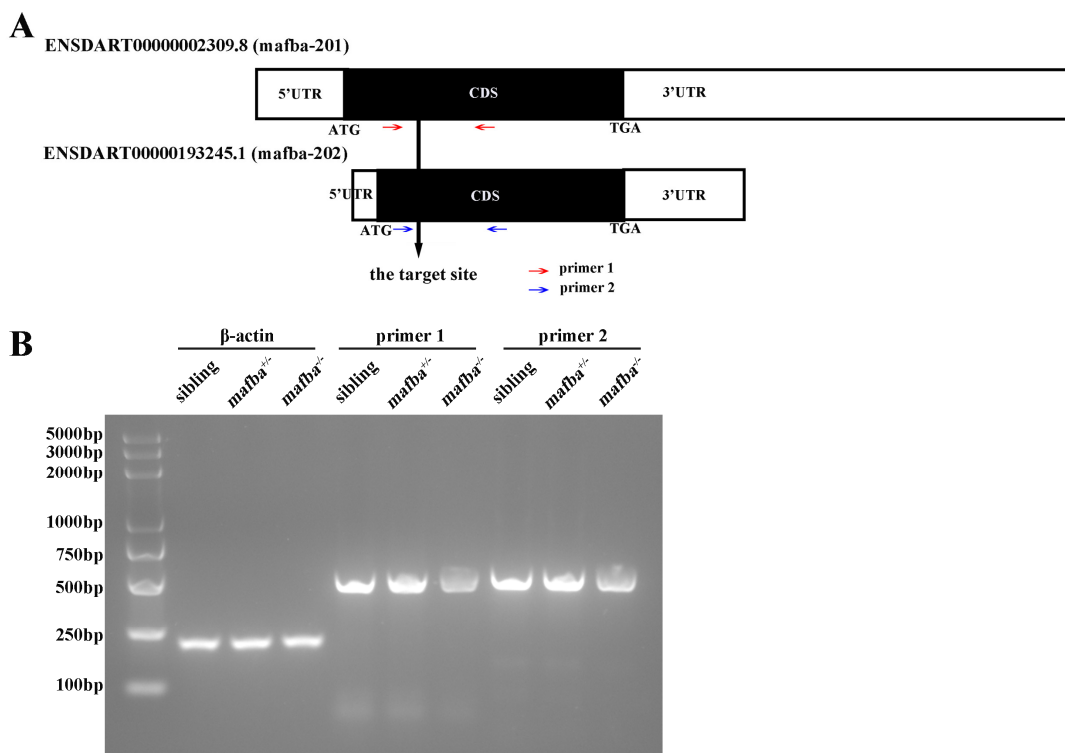

**Figure S2.** The *mafba* mRNA levels were detected in 4 dpf sibling and *mafba* mutant zebrafish by RT-PCR. (A) Location of the two primer pairs used for RT-PCR experiments. (B) Semi-RT-PCR analysis shows the relative expression of *mafba* in sibling, *mafba*<sup>+/-</sup> and *mafba*<sup>-/-</sup> embryos at 4 dpf.  $\beta$ -actin was served as endogenous control.

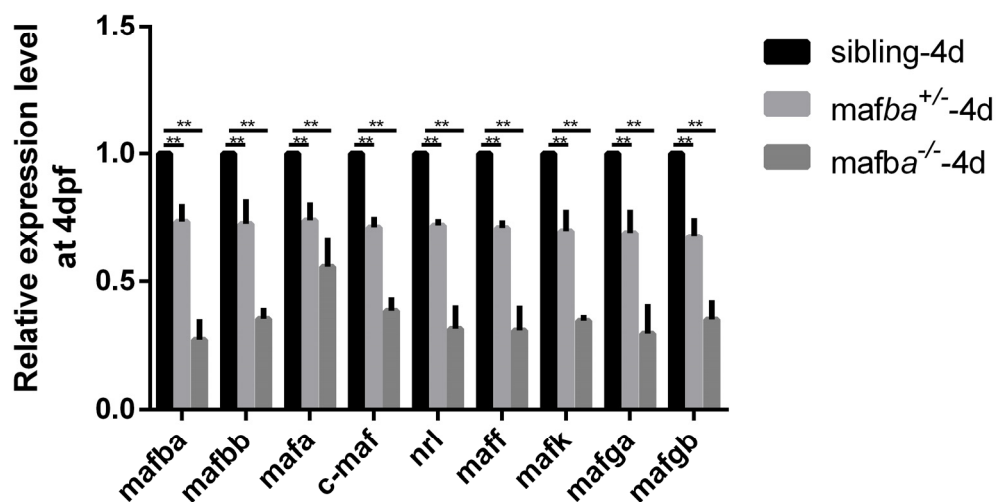

**Figure S3.** Relative expressions of large maf (*mafba*, *mafbb*, *mafa*, *c-maf* and *nrl*) and small maf (*maff*, *mafk*, *mafga* and *mafgb*) were determined by qRT-PCR analysis in sibling, *mafba*<sup>+/-</sup> and *mafba*<sup>-/-</sup> embryos at 4 dpf.  $\beta$ -actin was served as endogenous control. Data are represented as mean  $\pm$  SD in each bar. \*,  $p < 0.05$ ; \*\*,  $p < 0.01$ .

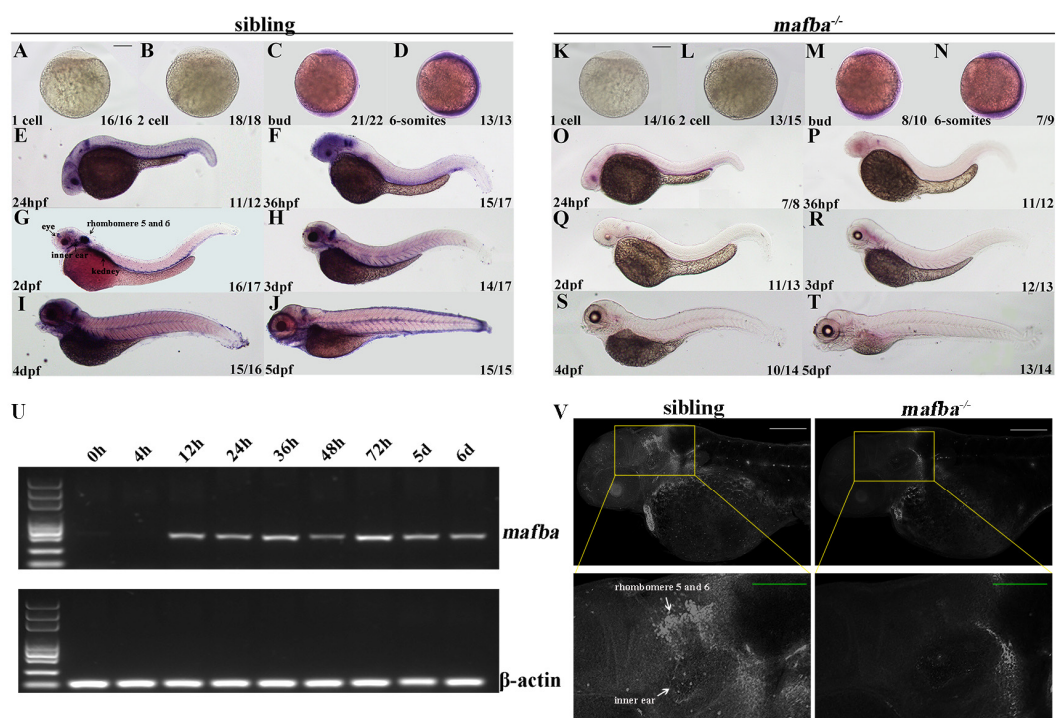

**Figure S4.** Expression of the zebrafish *mafba* gene during embryonic development in siblings and its corresponding homozygous mutants. Whole-mount *in situ* hybridization analysis of *mafba* gene expression in siblings (A-J) or *mafba*<sup>-/-</sup> mutants (K-T) at the developmental time-points indicated. Numbers at the bottom right indicate the number of embryos with similar staining pattern among all embryos examined. Scale bar: 200  $\mu$ m. (U) RT-PCR amplification from different embryonic developmental stages.  $\beta$ -actin was used as an internal control. (V) Immunostaining of the siblings and *mafba*<sup>-/-</sup> mutants zebrafish embryos using the antibody against zebrafish Mafba at 2 dpf. Dots indicate Mafba expressed cells.  $n = 10$  for each panel. White scale bar: 200  $\mu$ m, green scale bar: 100  $\mu$ m.

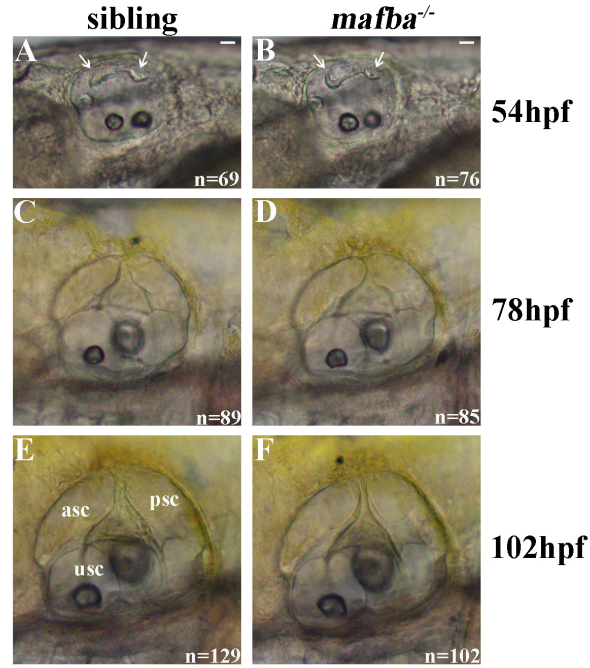

**Figure S5.** Early patterning of the inner ear appears normal in *mafba*<sup>-/-</sup> mutants. Live embryo pictures of siblings (A, C, E) and *mafba*<sup>-/-</sup> mutants (B, D, F) show that the inner ear sizes are comparable at 54 hpf and that the semicircular canal projections are forming normally (white arrow). And, no difference is observed between sibling and *mafba*<sup>-/-</sup> mutants at 78 hpf and 102hpf. asc, anterior semicircular canal; psc, posterior semicircular canal; usc, utricle sac. Scale bar: 20  $\mu$ m.

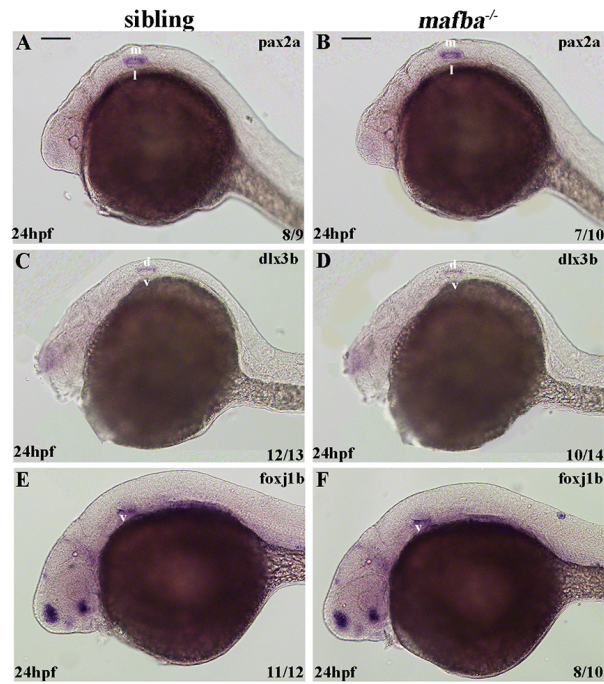

**Figure S6.** Early patterning of the otic vesicle appears normal in *mafba*<sup>-/-</sup> mutants. Whole-mount in situ hybridization shows that the expression of early patterning markers in the otic vesicle is indistinguishable between siblings and *mafba*<sup>-/-</sup> mutants. Normal expression is seen for *dlx3b* dorsally (A, B), *pax2a* medially (C, D) and *foxj1b* ventrally (E, F) at 24 hpf. m, medial; l, lateral; d, dorsal; v, ventral; Scale bar: 100  $\mu$ m.



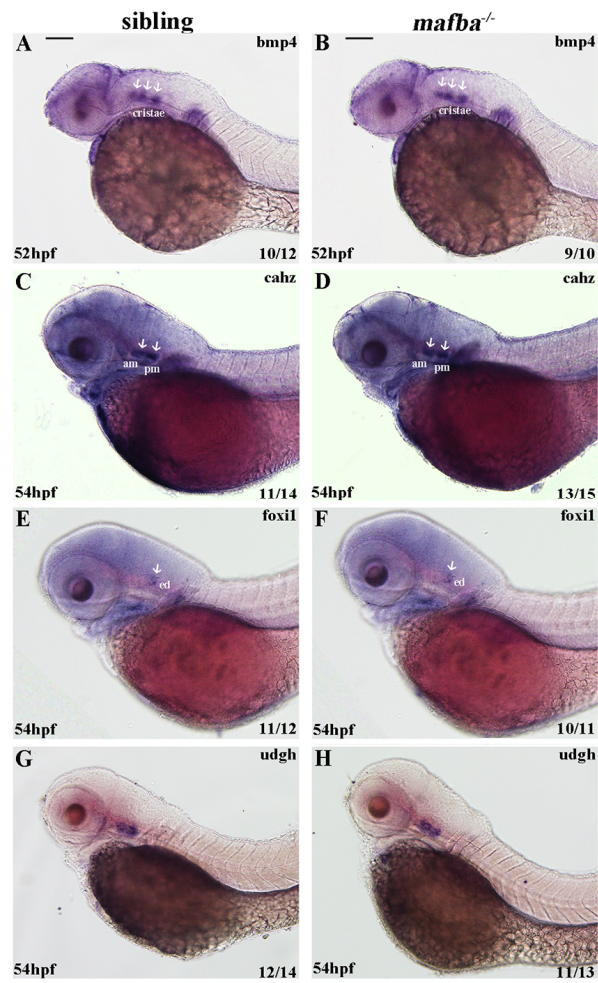

**Figure S7.** The expression of otic specification related markers was normal in *mafba*<sup>-/-</sup> mutant embryos. *In situ* hybridization was performed using *bmp4*, *cahz*, *foxi1* and *udgh* probes. *bmp4* and *cahz* mark the cristae (A, B, white arrow) and maculae (C, D, white arrow), respectively. The endolymphatic duct (ed), marked by expression of *foxi1* (E, F, white arrow), appears to evaginate normally. The semicircular canal projections marked by *udgh* also form normally (G, H). AM, anterior macula; PM, posterior macula; Scale bar: 100  $\mu$ m.



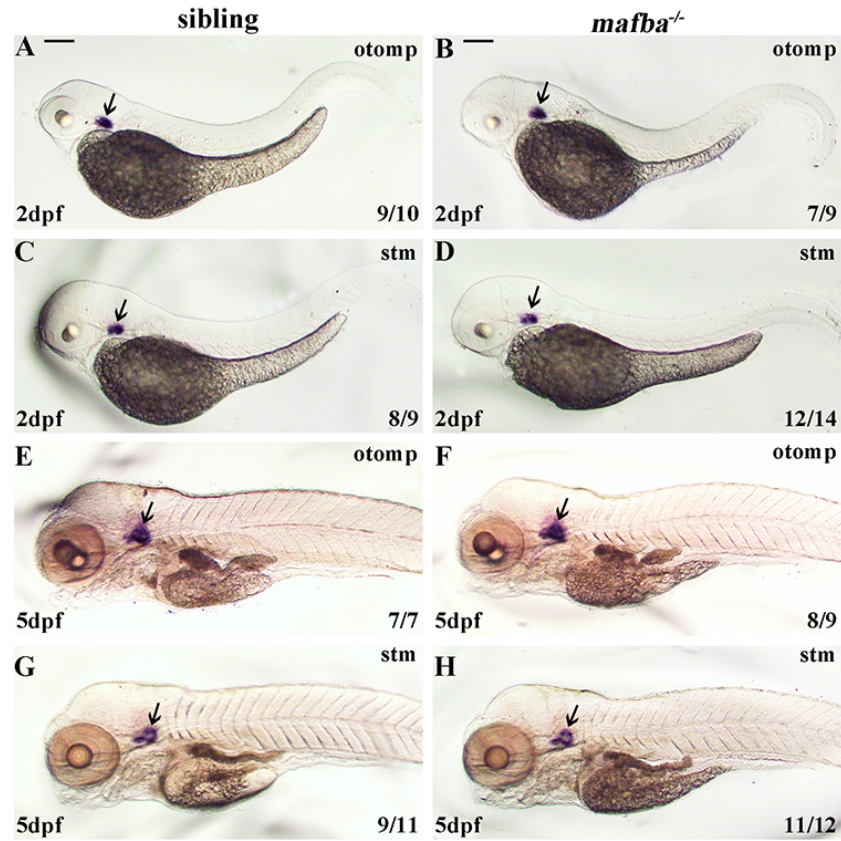

**Figure S8.** The expression of two otic matrix protein markers was normal in *mafba*<sup>-/-</sup> mutant embryos at 2 and 5 dpf. The signal points were pointed by black arrows. *In situ* hybridization was performed using *otomp* (A, B, E, F) and *stm* (C, D, G, H) probe, respectively. Scale bar: 200  $\mu$ m.

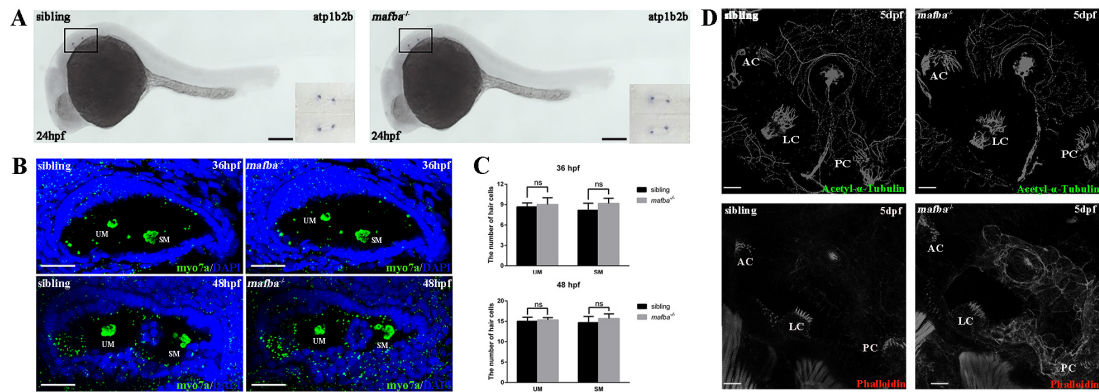

**Figure S9.** Deficiency of *mafba* does not affect hair cell development. (A) The expression of *atp1b2b* in hair cells at 24 hpf is normal in *mafba*<sup>-/-</sup> mutants, which is detected by *in situ* hybridization.  $n = 12$  for sibling and  $n = 11$  for *mafba*<sup>-/-</sup> mutants group. Scale bar: 200  $\mu$ m. (B) Immunostaining of hair cells by anti-Myo7a antibody at 36 and 48 hpf. Red color indicates myo7a expressed cells.  $n = 10$  for each panel. UM, utricular maculae; SM, saccular maculae; Scale bar: 20  $\mu$ m. (C) The quantitative analysis of hair cell numbers in the utricular and saccular maculae at 36 hpf and 48 hpf shown in (B). Data are represented as mean  $\pm$  SD. ns,  $p > 0.05$  by one-way ANOVA. (D) Immunofluorescence using anti-acetylated tubulin antibody shows normal kinocilia in mutants at 5 dpf. Phalloidin staining showed normal stereociliary bundles in mutants at 5 dpf.  $n = 12$  for each panel. AC, anterior crista; LC, lateral crista; PC, posterior crista; Scale bars: 20  $\mu$ m.

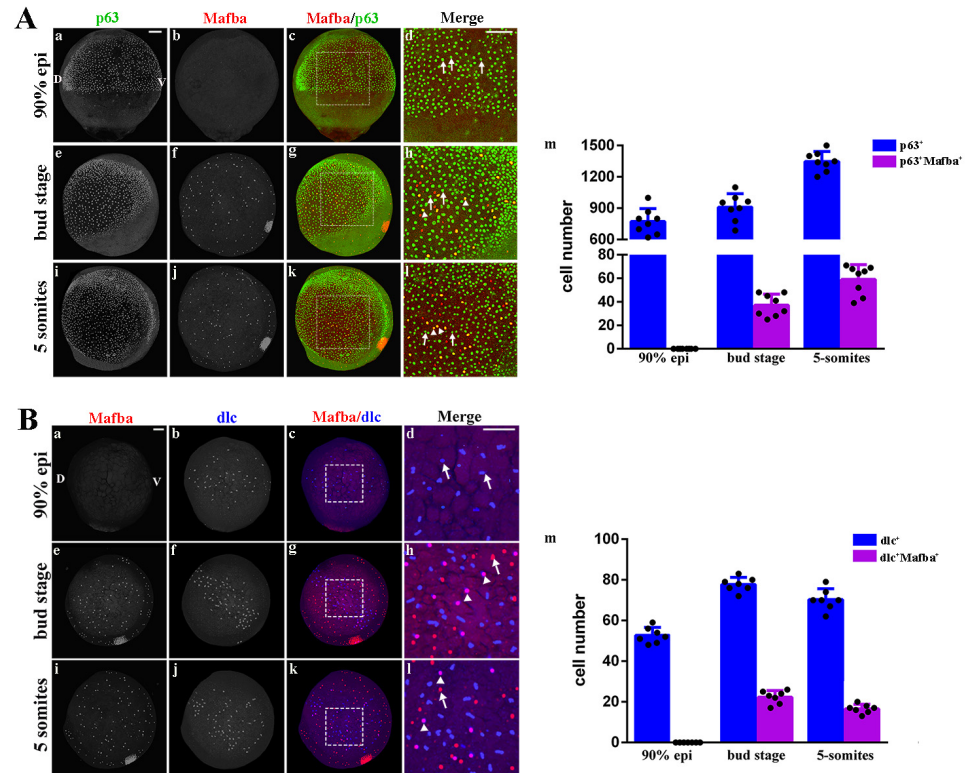

**Figure S10.** Mafba protein expression pattern and colocalization of Mafba/p63 and Mafba/dlc during late gastrulation and early somite stages. **(A)** Images of Mafba protein expression during different embryonic developmental stages are shown (b, f, j), and the p63 expression during different embryonic developmental stages are shown (a, e, i). Colocalization of Mafba and p63 is detected in ventral ectoderm of embryos at various stages, including 90% epiboly, bud and 5s (c, g, k). Enlargements of Mafba and p63 merged images (d, h, l) are shown from the areas (c, g, k). p63<sup>+</sup> epidermal stem cell number and p63<sup>+</sup>Mafba<sup>+</sup> cell number at indicated embryonic stages are shown in (m). *n* = 8 for each panel. Scale bars: 100  $\mu$ m. **(B)** Images of Mafba protein expression during different embryonic developmental stages are shown (a, e, i), and the dlc protein expression during different embryonic developmental stages are shown (b, f, j). Colocalization of Mafba and dlc was detected in ventral ectoderm of embryos at various stages, including 90% epiboly, bud and 5s (c, g, k). Enlargements of Mafba and dlc merged images (d, h, l) are shown from the (c, g, k). dlc<sup>+</sup> epidermal stem cell number and dlc<sup>+</sup>Mafba<sup>+</sup> cell number at indicated embryonic stages is shown in (m). *n* = 7 for each panel. Scale bars: 100  $\mu$ m.

**Table S1.** Primers used for Cas9 target design, WISH probes construction, genotype identification, and qRT-PCR.

| Terms       | Primer names   | Forward                 | Reverse                  |
|-------------|----------------|-------------------------|--------------------------|
| Cas9 target | <i>mafba</i>   | TGCTCGGGCGAGGTAGGAGAAGG |                          |
|             | <i>mafba</i>   | TGGAGGAGCTGTACTGGATGC   | CGAGGTAGGAGAAGGGCTGTC    |
|             | <i>pax2a</i>   | CTCCATATCGTACCCGTCTGAA  | CGAACACAAACCATCAGCGAAA   |
|             | <i>dlx3b</i>   | TCTCCCAGAGTCATCGGCTA    | CGTTTACCATCCGCACTTC      |
|             | <i>foxi1b</i>  | GAATGCCTGCCACAACTT      | TGAGAACATCCCCTCGTAA      |
|             | <i>bmp4</i>    | CCTTGCTGTGGAGGTTGTA     | CGTGATTGGTGGAGTTGAG      |
| WISH Probes | <i>cahz</i>    | GAAGTATGACCCAGCCACC     | GTCTGTCTGCCCTTTGATT      |
|             | <i>foxi1</i>   | CCAAACTGCGAGAAGATGT     | ACTGTTGTTGTGCGATGCT      |
|             | <i>udgh</i>    | ACACCTGGTCCTCTGAAC      | CGTCACCTTCTTACCGATG      |
|             | <i>atp1b2b</i> | TTTCATCCAGGAGGACAGCG    | CCAACCTTTGTATTTCTTCGCACC |
|             | <i>otomp</i>   | CACCCAGGGATGAGGACTA     | GCACATCAGGCTGCCATA       |
|             | <i>stm</i>     | CTGACAGTGCATCGGTAGAGG   | GCATAGAAGTTTCCTGCCATC    |
|             | <i>dlc</i>     | GGCAGTTGCAATGACCAGGA    | ACCTTAAATGGGCCACCAGG     |
|             | <i>foxi3a</i>  | TGACAGCGATCCAGGAAAAGG   | TACTCAGGCACCGCAATGAG     |

|                                |                  |                           |                            |
|--------------------------------|------------------|---------------------------|----------------------------|
|                                | <i>foxi3b</i>    | CTGGAGGGGAATTGAGCTGG      | TGCCCACAGAACTCAAAGGAG      |
|                                | <i>atp1a1a.4</i> | TCCTCCCCCTCCGATTTAGT      | CACGGTTTGAGCGGATACA        |
|                                | <i>atp6v1aa</i>  | ACGCAGAGCATCTACATCCC      | ATGGCAGTGGTTCCTCCTTG       |
|                                | <i>atp1a1a.1</i> | TACCTTTGGGCACCGTCA        | TCTATCTTCCCAGCCAACG        |
|                                | <i>atp1b1a</i>   | AGCCCACATACCAGGACAGG      | ACTCGCCCAGCCATTCTC         |
| <b>Genotype Identification</b> | <i>mafba(wt)</i> | GTCCTCCACTCCTATCAGCA      | CGCCGTA CTGGTGTGATGGTGAT   |
|                                | <i>mafba(mt)</i> | GGCTCCGTGTCCTCCTCAGC      | CGCCGTA CTGGTGTGATGGTGAT   |
| <b>RT-PCR</b>                  | <i>mafba-201</i> | CCCGCTGGCGTTGGAATATGTC    | CGCCGTA CTGGTGTGATGGTGAT   |
|                                | <i>mafba-202</i> | CGAGGTAAAGAAAGAGGCCATGG   | GTGGTGGTGGTGTGATGGTGGGGGTG |
|                                | <i>cdk1</i>      | GGCAGGAATAAAACCACAGGAC    | TCAGCACATCTAGCAGGCGTA      |
|                                | <i>cdk2</i>      | AAGAGTTTCAGTCGCCCCGTT     | GGAACACCTTCAGTTTCCGTAT     |
|                                | <i>cdk4</i>      | ACGGTTACGGAGGATCAGCA      | CACGTCCATCAGCCTGACGAT      |
|                                | <i>cdk6</i>      | CGGCAAATCACTCCTACTTCGTTTC | CGAAAGGAAAACCTGACGGAC      |
|                                | <i>ccna1</i>     | GGCCAAAGAATTGTGCTCGG      | ATCCATAAATGACCCTGAGCC      |
|                                | <i>ccnb1</i>     | TGTGGTGACTGGACCCCTAC      | GCAGCACACAGTCGTAAAGT       |
|                                | <i>ccnc1</i>     | TCCTCCTAACAGCGAGACTG      | GAGGTGGAGTCTGCCTTGATT      |
|                                | <i>ccnd1</i>     | AAACACGCCCCAGACCTTTGT     | ATCGCAGACAGTCAGGGTC        |
|                                | <i>ccne1</i>     | AGCAGACGTGGCTATTCAAT      | GAAGAGGGGTAGAGCGTGTG       |
|                                | <i>ccng1</i>     | CATCTCTAAAAGAGGCTCTAGATGG | CACACAAACCAGGTCTCCAG       |
|                                | <i>cdkn1a</i>    | TCCAGCTTCAGGTGTTCTCA      | TGAACGTAGGATCCGCTTGT       |
|                                | <i>cdkn1b</i>    | AAGCTCCTGTCTCGACTCATC     | TTATTCCCCCTCCTCGCTCC       |
|                                | <i>cdkn2a</i>    | GCGTTGAACTGATTGTTTTCG     | GTTACCCATCATCATCACCTGTAT   |
|                                | <i>cdkn3</i>     | ATGTCCGCGCATGCGTATT       | GATCACACATCTCGGCAACA       |
|                                | <i>cul1a</i>     | CAAGAACCCAGAGGAGGCAG      | AGCCACACGCTTGCTTTAGT       |
|                                | <i>cul1b</i>     | TCGTGTACCTGTCATCAAGAAAT   | GGTATGTGTGCGTCCACTCT       |
|                                | <i>cul2</i>      | TGTTTCGTGGAGTCGGTGTTAG    | TTCTCCGTCATTCCCTTTAGCC     |
|                                | <i>cul3</i>      | GAAGGACACCAAGATGCGGA      | AGCACGTCTTCTCGAACTTTG      |
|                                | <i>cdc25b</i>    | CTCGCTGTTCTTGGAGGTCAA     | CCACACTCCATAACGGGAGG       |
|                                | <i>myca</i>      | TCTGACGCCACTTATGCTGC      | ACTCACCGGCATTTTGACACTTG    |
|                                | <i>mycb</i>      | TTTACCACGGCTACGGCACT      | ACCACATCGTCCCCCAAAAA       |
|                                | <i>dhfr</i>      | CAGAGAACTCAAGACAGCCC      | TGAGGATGCGGGTTACAAACA      |
|                                | <i>e2f1</i>      | CGCTTCAAATGGACCCACAC      | GTCGATACGATTCCCTAGCCA      |
|                                | <i>e2f3</i>      | GTGCCTGACCCAAAGGAGAGTC    | CCGTTGACGCCACCGTTT         |
|                                | <i>foxa1</i>     | ATAATGATGCACAAGAGGTCTATTC | GCTGGGTTTCGCATAGGACA       |
|                                | <i>rangap1a</i>  | GGCAACAGTCTGGGTGAAGA      | GAGGCGTGGAGAACTGGTTTA      |
|                                | <i>tk1</i>       | CCACGGAAGACAAGAGGACAG     | CAACGGTGTCTGGGAAAAACTG     |
|                                | <i>rb1</i>       | AGCAGACGGAAGCAAATCCA      | CAACGCAGGGAAAGCATCTG       |
|                                | <i>p53</i>       | GGGCAATCAGCGAGCAAA        | ACTGACCTTCCTGAGTCTCCA      |
|                                | <i>puma</i>      | TGGAAAGCAGAGTGGACGAA      | GATGGCAGGGCTGGATGA         |
|                                | <i>baxa</i>      | CGTTGTTTCGTATTGGCAGTGG    | TGGCTGGGGTCACTTTTCTC       |
|                                | <i>bcl2a</i>     | CGAGTTTGGTGGGACCATGT      | CGTACATCTCCACGAAGGCA       |
|                                | <i>mdm2</i>      | AAGCAGTGATCCTGAGAGTTC     | ATCCGAAGACTCGCTGTTC        |
|                                | <i>mdm4</i>      | ATTCGGATGCGGCAAAGA        | CCCACTGGACACCTGACC         |
|                                | <i>caspase8</i>  | GGCACTGATATGGACAAAGATAGA  | GCATCCGGCAAAGGCAAAG        |
|                                | <i>caspase10</i> | TTGAGAATTCGATGGTGGAGCA    | ACTGTCGTGGTCGATGTCTG       |
